# Supplementary material for: Protocols for the Evaluation of Neurodevelopmental Alterations in Rabbit Models In Vitro and In Vivo
Source: Frontiers journal article supplement (doi:10.3389/ftox.2022.918520), 2022-07-22
Supplement: Data_Sheet_1.pdf [file Data_Sheet_1.pdf]

## **Supplementary file 1. REAGENTS AND SOLUTIONS**

### ***Reagents and solutions protocol 1***

#### **a) Medication for anesthetic induction**

- i. Ketamine 50 mg/dl (35 mg/kg) – total volume calculation: mg/50mg
- ii. Xylazine 2% (5 mg/kg) – total volume calculation: mg/20 mg
- iii. Atropine: 1.0 - 3.0 mg/kg

#### **b) Medication for anesthetic maintenance**

- i. Put 4 ml of ketamine and 3 ml of xylazine in 100 ml of FS. Connect FS with serum equipment and connect to a high-precision flow regulator, adjust it to 30 – 40 ml/h (necessary dose for an animal of 4-5 kg)
- ii. For rescue anesthesia: syringe with propofol 10 mg/kg e.v. (never > 15 – 20 mg/kg)

### ***Reagents and solutions for protocol 2***

#### **a) Tissue digestion solution:**

- i. 975 µL MEM (prewarmed).
- ii. 20 µL Papain.
- iii. Incubate 10 min at 37 °C.
- iv. Add 10 µL DNase I.
- v. Sterile filtrate with a syringe filter.

#### **b) Ovomucoid solution:**

- i. 975 µL DMEM (prewarmed).
- ii. 10 µL DNase I.
- iii. 5 µL BSA (10 % in PBS).
- iv. 10 µL Trypsin-Inhibitor (prewarmed).
- v. Sterile filtrate with syringe filter.

#### **c) Freezing medium:**

- i. 70 % B27.
- ii. 20 % FBS.
- iii. 10 % DMSO.

#### **d) Poly-HEMA coating:**

- i. Materials:
  - Poly (2-hydroxyethyl methacrylate).
  - 96 % (v/v) ethanol.
  - H<sub>2</sub>O, deionized and sterile.
- ii. Poly-HEMA solution:

- Pour 39.5 mL of 96 % (v/v) ethanol and 500  $\mu$ L of  $d_4H_2O$  into a 50 mL conical tube and mix them.
  - After mixing, add 1.2 g of poly-HEMA into the conical tube and dissolve it using a plate rotator o.n. at RT.
  - Store this poly-HEMA stock solution at 4 °C for up to 2 months.
- iii. Coating of dishes and plates with Poly-HEMA solution:
- Apply the appropriate volume of the poly-HEMA solution (Table S1) to each dish or well in the tissue culture hood.
  - Spread the poly-HEMA solution over the entire surface of each dish or well.
  - Leave the dish or plate o.n. without lid to allow the poly-HEMA solution to completely evaporate.
  - The poly-HEMA-coated dishes can be used for 3 months after coating when stored at RT in the dark.

*Table S1. Volume of poly-HEMA solution for dish or well coating.*

| Dish size        | Volume of poly-HEMA solution |
|------------------|------------------------------|
| 90 mm (diameter) | 3.2 mL                       |
| 60 mm (diameter) | 1.3 mL                       |
| 35 mm (diameter) | 500 $\mu$ L                  |
| 12 well          | 200 $\mu$ L                  |
| 24 well          | 100 $\mu$ L                  |
| 48 well          | 70 $\mu$ L                   |
| 96 well          | 25 $\mu$ L                   |

### ***Reagents and solutions for protocol 3***

- a) Laminin solution: Add  $d_4H_2O$  to the Laminin solution to reach a final concentration of 1 mg/mL. The amount of water added needs to be determined for each new lot. Store Laminin at -20 °C.
- b) PDL solution: Dilute 50 mg PDL in 500 mL  $d_4H_2O$ , aliquot and store at -20 °C.
- c) First antibody solution immunocytostaining of neurospheres:
- i. 1st antibody (dilution as indicated in Table S2).
  - ii. 10 % goat serum.
  - iii. PBS or PBST for intracellular epitopes.
- d) Second antibody solution immunocytostaining of neurospheres:
- i. 2<sup>nd</sup> antibody (dilution as indicated in Table S2).
  - ii. 1 % Hoechst (stock: 0.2 mg/mL).
  - iii. 2 % goat serum.
  - iv. PBS.

Table S2. Antibody solutions

| 1 <sup>st</sup> antibody         |                  | Species | Type | Antigene                         | Dilution | Incubation    |
|----------------------------------|------------------|---------|------|----------------------------------|----------|---------------|
| O4                               | Oligodendrocytes | Mouse   | IgM  | Surface epitope                  | 1:200    | o.n., 4 °C    |
| β(III)-Tubulin                   | Neurons          | Rabbit  | IgG  | Cytoskeleton                     | 1:200    | 1h, 37 °C     |
| GFAP                             | Astrocytes       | Rabbit  | IgG  | Cytoskeleton                     | 1:200    | o.n., 4 °C    |
| 2 <sup>nd</sup> antibody         |                  | Species | Type | 1 <sup>st</sup> antibody binding | Dilution | Incubation    |
| anti-Mouse IgM, Alexa Fluor 488  |                  | Goat    | IgM  | O4                               | 1:200    | 30 min, 37 °C |
| anti-Rabbit IgG, Alexa Fluor 488 |                  | Goat    | IgG  | β(III)-Tubulin                   | 1:100    | 30 min, 37 °C |
| anti-Rabbit IgG, Alexa Fluor 546 |                  | Goat    | IgG  | GFAP                             | 1:200    | 30 min, 37 °C |

Abbreviations: o.n.: overnight.

e) PDL-laminin coating of 8-Chambered Cell Culture Slides:

- i. Thaw PDL solution at 37 °C and add 250 µL PDL solution to chambers of an 8-chamber slide.
- ii. Incubate for 1 h at 37 °C.
- iii. Thaw Laminin solution at 4 °C and dilute it 1:100 in dH<sub>2</sub>O.
- iv. Remove PDL solution.
- v. Wash chambers/wells with dH<sub>2</sub>O.
- vi. Add laminin dilution to chambers/wells.
- vii. Incubate for 1 h at 37 °C.
- viii. Wash chambers with dH<sub>2</sub>O and sterile PBS.
- ix. Coated slides can be stored at 4 °C for up to one week.

Table S3. Volume of PDL and Laminin solution for dish or well coating.

| Dish size       | PDL and Laminin | H <sub>2</sub> O washing and PBS storage |
|-----------------|-----------------|------------------------------------------|
| 8-chamber-slide | 250 µL          | 500 µL                                   |
| 96 well         | 50 µL           | 100 µL                                   |
| 48 well         | 150 µL          | 300 µL                                   |
| 24 well         | 300 µL          | 500 µL                                   |
| 12 well         | 500 µL          | 1 mL                                     |
| 6 well          | 1 mL            | 2 mL                                     |

f) Controls for the neurosphere differentiation and migration assays:

- i. Background control: only N2 media without spheres.
- ii. Solvent control: N2 media with respective solvent with spheres.
- iii. Positive controls:
  - Lysis control: N2 media with respective solvent with spheres.
  - Oligodendrocyte differentiation: 100 ng/mL BMP7.
  - Neuronal differentiation: 10 ng/mL EGF.

- Migration: 10  $\mu$ M PP2.

g) Controls for cell titer blue (CTB) assay:

i. Lysis control: culture medium with cells. Add DMSO to a final concentration of 10% 30 min before addition of CTB-reagent.

ii. Background control: culture medium without cells.

h) Controls for proliferation assay:

i. Solvent control: B27 media with respective solvent.

ii. Positive control: B27 media without growth factors (B27 w/o).

iii. If combined with CTB Assay prepare lysis control and background control.

- Background control: only B27 media.

- Lysis control: Solvent control with spheres.

### ***Reagents and solutions for protocol 5***

a) Sucrose 30 %: 30 g sucrose in 100 mL phosphate buffer 0.1 M.

### ***Reagents and solutions for protocol 6***

a) Solution A+B in proportion 1:1 (should be prepared 24 h prior to use, and has 1 month of viability). Prepare 5 mL of solution/1 cm<sup>3</sup> of tissue (15 mL per brain, approximately).

b) Cresyl violet: 0.1 g/100 mL dH<sub>2</sub>O + 2 drops of acetic acid. Prepare 24 h before use, viability 1 year.

### ***Reagents and solutions for protocols 7, 8, 9 and 14.***

a) IHC blocking solution:

i. 10 % fetal bovine serum (10 mL/100 mL).

ii. 0.2 M glycine (0.15 g/100 mL).

iii. 0.2 M gelatin (0.2 g/100 mL).

iv. PBST 0.3 %.

b) PBST 0.3 %: 2.4 mL Triton + 797.6 mL PBS.

c) Oligodendrocyte immunocytochemistry solutions:

i. Primary antibody (Mouse IgM anti-O4) solution: 1  $\mu$ L antibody + 49  $\mu$ L PBST/cut.

ii. Secondary antibody (Alexa Fluor 488 goat anti-mouse IgM) solution: 0.5  $\mu$ L Hoechst + 49,375  $\mu$ L PBST + 0.125  $\mu$ L antibody/cut.

d) Perineuronal nets immunocytochemistry solutions:

i. Primary antibody solution: 20  $\mu$ L antibody + 190  $\mu$ L blocking solution + 190  $\mu$ L PBST 0.3 % /slide.
