# Supplementary material for: Protocols for the Evaluation of Neurodevelopmental Alterations in Rabbit Models In Vitro and In Vivo
Source: Frontiers journal article supplement (doi:10.3389/ftox.2022.918520), 2022-07-22
Supplement: Data_Sheet_2.pdf [file Data_Sheet_2.pdf]

## BEHAVIORAL ONTOGENY TEST

|                           |                          |                      |
|---------------------------|--------------------------|----------------------|
| Fetus ID: _____ - _____   | Chip code/ear code _____ | Postnatal day: _____ |
| Date of evaluation: _____ | Exposure: _____          | Dose: _____          |

**NEUROLOGICAL EVALUATION** (Derrick 2004) (0: worst – 3/4: best)    Weigh fetus at +1P: \_\_\_\_\_g

### A- Posture

- |   |                                |
|---|--------------------------------|
| 0 | Lays supine                    |
| 1 | Lays on side                   |
| 2 | Cannot maintain prone position |
| 3 | Prone position                 |

### B- Righting reflex (10 tries)

|  |                                             |
|--|---------------------------------------------|
|  | Nº times turns prone from supine _____rapid |
|--|---------------------------------------------|

### C- Tone

- |   |                                                   |
|---|---------------------------------------------------|
| 0 | No increase in tone                               |
| 1 | Slight increase in tone when limb is moved        |
| 2 | Marked increase in tone but limb is easily flexed |
| 3 | Increase in tone, passive movement difficult      |
| 4 | Limb rigid in flexion or extension                |

### D- Circular motion (one minut)

- |   |                                                                 |
|---|-----------------------------------------------------------------|
| 0 | No movement                                                     |
| 1 | Slight movement, slight jump                                    |
| 2 | Good range of motion, maintains for 1or 2 steps occasional jump |
| 3 | Entire range of motion, at least 3 steps,rapid jumps            |

### E- Locomotion:

- |   | Head                     | Forelimbs | Hindlimbs |
|---|--------------------------|-----------|-----------|
| 0 | No movement _____        | _____     | _____     |
| 1 | Slight movement _____    | _____     | _____     |
| 2 | Distinct movement, _____ | _____     | _____     |
| 3 | Rapid movement, _____    | _____     | _____     |

### F- Intensity

- |   |                             |
|---|-----------------------------|
| 0 | No movement                 |
| 1 | Slight activity             |
| 2 | Distinct forceful movements |
| 3 | Rapid forceful movements    |

### G- Duration (observation for 1 minut)

- |   |                    |
|---|--------------------|
| 0 | No movement        |
| 1 | Activity <20 sec   |
| 2 | Activity 20-40 sec |
| 3 | Activity >40 sec   |

### H- Lineal movement ( 1min, distance 15 cm)

|  |                                        |
|--|----------------------------------------|
|  | Nº of times crosses perpendicular line |
|--|----------------------------------------|

### I- Shortest fore-hindpaw distance

|  |                                                |
|--|------------------------------------------------|
|  | 5 measurements (if pup walks in straight line) |
|--|------------------------------------------------|

### J- Sucking and swallowing

- |   |                                                          |
|---|----------------------------------------------------------|
| 0 | No movement of jaw, milks dribbles out completly         |
| 1 | Some movement of jaw and neck, most of milk dribbles out |
| 2 | Definite suck and swallow, some milk in nose             |
| 3 | Good suck and swallow, no milk in nose                   |

### K- Head turning during feeding

- |   |                                           |
|---|-------------------------------------------|
| 0 | No movement                               |
| 1 | Slight occasional movement of head        |
| 2 | Distinct movement of head                 |
| 3 | Rapid forceful movements of head and body |

## ODOUR TEST

|                         |                                            |                                              |
|-------------------------|--------------------------------------------|----------------------------------------------|
| Aversive response _____ | (0-No,1-subtil, 2-low response, 3-correct) | Latency in aversive response _____ (seconds) |
|-------------------------|--------------------------------------------|----------------------------------------------|
